# Supplementary material for: Accuracy of Hard Tissue Predictions in Mono- and Bimaxillary Orthognathic Surgery Using 3D Virtual Surgical Planning
Source: Research Square preprint supplement (doi:10.21203/rs.3.rs-8436476/v1), 2026-01-13

**SUPPLEMENTARY FIGURES AND TABLES**

***Supplementary Table 1***. Retrospective power analysis

|  |  | |  |  |  | Standard deviation | |
| --- | --- | --- | --- | --- | --- | --- | --- |
| N | α | | Power | Mean difference |  | Wilcoxon | Paired t-test |
| 29 | | 0.05 | 0.8 | ±2° |  | 4.124°¹ | 4.226°¹ |
| 41 | | 0.05 | 0.8 | ±2° |  | 4.943°¹ | 5.063°¹ |
| 53 | | 0.05 | 0.8 | ±2° |  | 4.980°² | 5.100°² |
| N = sample size. Standard deviations were rounded to three decimal places. Power analysis was conducted using the statistic program G*Power (version 3.1.9.7 for Windows, University of Düsseldorf, Germany). Calculation was done for one-sided¹ and two-sided² testing. | | | | | | | |

***Supplementary Table 2***. Patient characteristics by study population

|  | Primary study population | | | | Mandibula subpopulation | | |
| --- | --- | --- | --- | --- | --- | --- | --- |
| Characteristics | Total (n=53) | | BSSO (n=24) | BSSO + Le Fort I (n=29) | Total (n=41) | BSSO (n=19) | BSSO + Le Fort I (n=22) |
| Gender, n (%) | |  |  |  |  |  |  |
| Male | | 25 (47.2) | 10 (41.7) | 15 (51.7) | 18 (43.9) | 6 (31.6) | 12 (54.5) |
| Female | | 28 (52.8) | 14 (58.3) | 14 (48.3) | 23 (56.1) | 13 (68.4) | 10 (45.5) |
| Age (years) | |  |  |  |  |  |  |
| Mean ± SD | | 31.6 ± 9.5 | 33.3 ± 10.5 | 30.2 ± 8.4 | 32.3 ± 8.6 | 33.7 ± 9.9 | 31.2 ± 7.4 |
| Min - Max | | 20 - 59 | 20 - 59 | 20 - 51 | 20 - 59 | 20 - 59 | 20 – 46 |
| Angle, n (%) | |  |  |  |  |  |  |
| I | | 1 (1.9) | 0 (0.0) | 1 (3.4) | 1 (2.4) | 0 (0.0) | 1 (4.5) |
| II | | 20 (37.7) | 14 (58.3) | 6 (20.7) | 15 (36.6) | 11 (57.9) | 4 (18.2) |
| III | | 28 (52.8) | 8 (33.3) | 20 (69.0) | 22 (53.7) | 6 (31.6) | 16 (72.7) |
| mixed | | 4 (7.5) | 2 (8.3) | 2 (6.9) | 3 (7.3) | 2 (10.5) | 1 (4.5) |
| N = sample size. Min – Max = minimum and maximum. Angle = classification by Angle. Mandibula subpopulation = Subpopulation to analyze postoperative mandibular-dependent parameters. | | | | | | | |

***Supplementary Table 3***. Analysis of subgroup differences

| Angle | N | BSSO  (2D-3D mean) | N |  | BSSO + Le Fort I (2D-3D mean) | p-value |
| --- | --- | --- | --- | --- | --- | --- |
| SNB | 19 | -0.495 | 22 |  | -0.914 | 0.137¹ |
| ANB | 19 | 0.505 | 22 |  | 1.014 | 0.146² |
| SNPog | 19 | -0.942 | 22 |  | -1.391 | 0.346² |
| MnP-NS | 19 | 1.647 | 22 |  | 2..405 | 0.294² |
| MxP-MnP | 19 | 1.600 | 22 |  | 2.373 | 0.289² |
| N = sample size. If not noted otherwise, values are presented in degrees and rounded to three decimal places. Two-sided calculation was done using unpaired t-test¹ or Mann-Whitney U test², depending on assumption of normality. Levene`s test showed homogeneity of variance in all cases where unpaired t-test was used. | | | | | | |

***Supplementary Table 4***. Planned angular shift and clinical agreement rate

|  |  | | Planned shift | |  | Achieved 2D-3D deviation | |
| --- | --- | --- | --- | --- | --- | --- | --- |
| Angle | N | | < ±2° | ≥ ±2° |  | < ±2° | ≥ ±2° |
| SNA | | 29 | 16 (55.2) | 13 (44.8) |  | 29 (100.0) | 0 (0.0) |
| SNB | | 41 | 19 (46.3) | 22 (53.7) |  | 36 (87.8) | 5 (12.2) |
| ANB | | 41 | 12 (29.3) | 29 (70.7) |  | 35 (85.4) | 6 (14.6) |
| SNPog | | 41 | 22 (53.7) | 19 (46.3) |  | 31 (75.6) | 10 (24.4) |
| MxP-NS | | 29 | 19 (65.5) | 10 (34.5) |  | 29 (100.0) | 0 (0.0) |
| MnP-NS | | 41 | 27 (65.9) | 14 (34.1) |  | 26 (63.4) | 15 (36.6) |
| MxP-MnP | | 41 | 23 (56.1) | 18 (43.9) |  | 25 (61.0) | 16 (39.0) |
| N = sample size. Data is presented as absolute (relative) frequencies. | | | | | | | |

***Supplementary Figures 1-7*** depict Bland-Altman plots showing the agreement between 2D and 3D cephalometric analysis preoperatively. Illustrated are the mean difference (─) as well as 95% limits of agreement (mean difference ± standard deviation; ─), each with respective 95% confidence interval (┅)


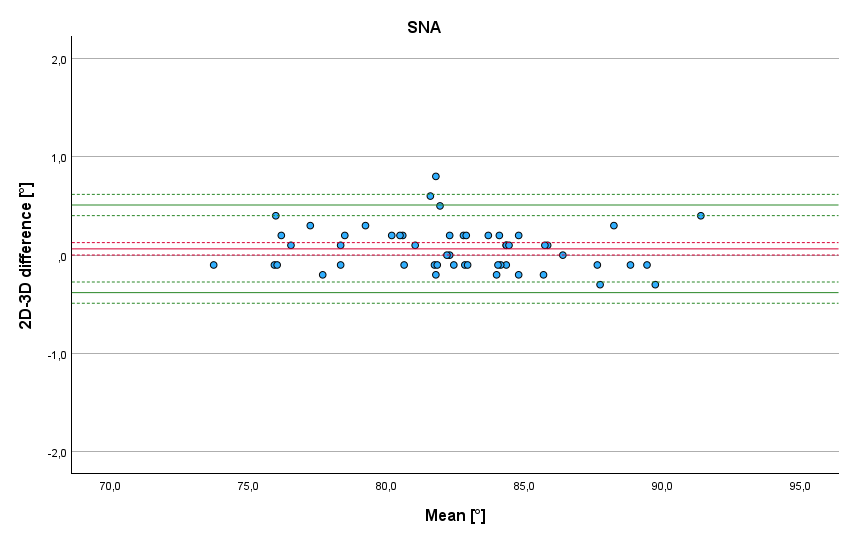


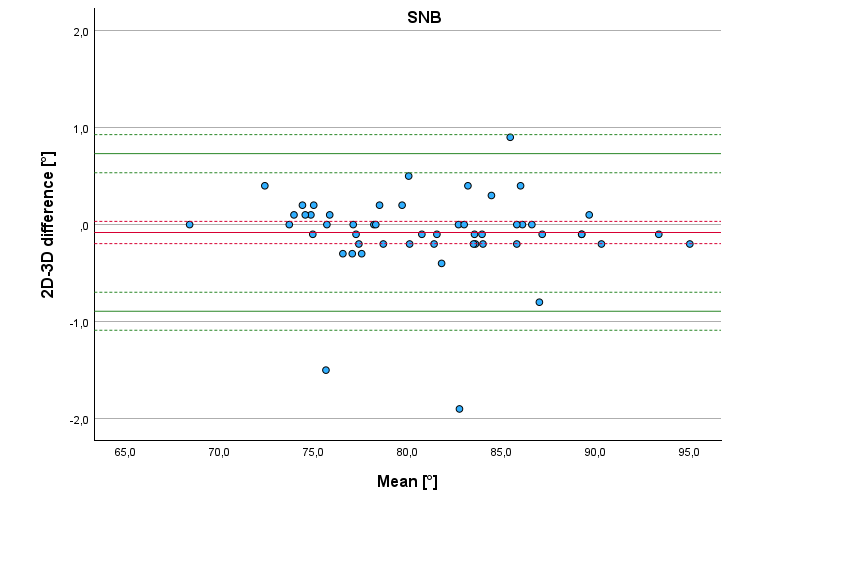


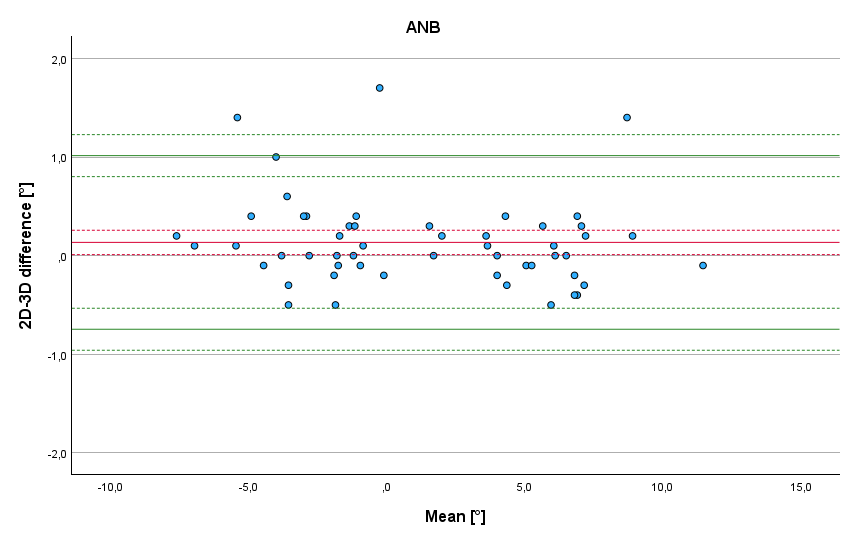


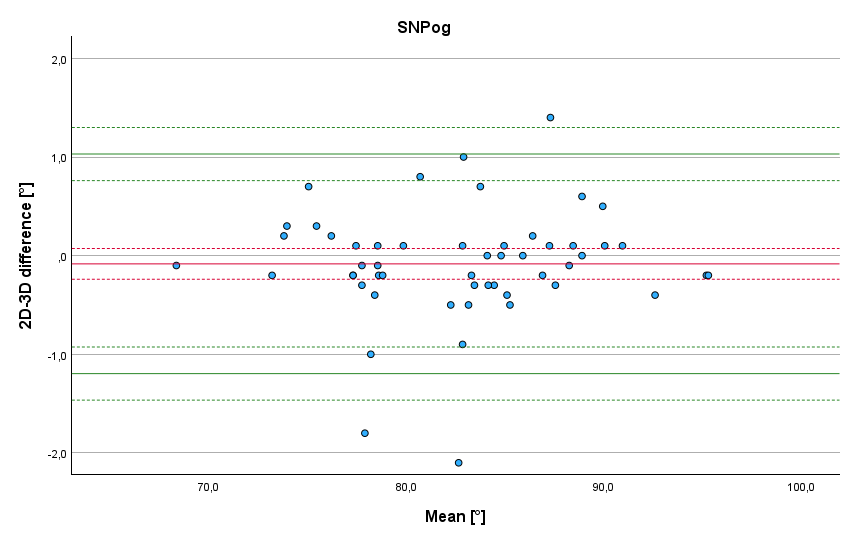

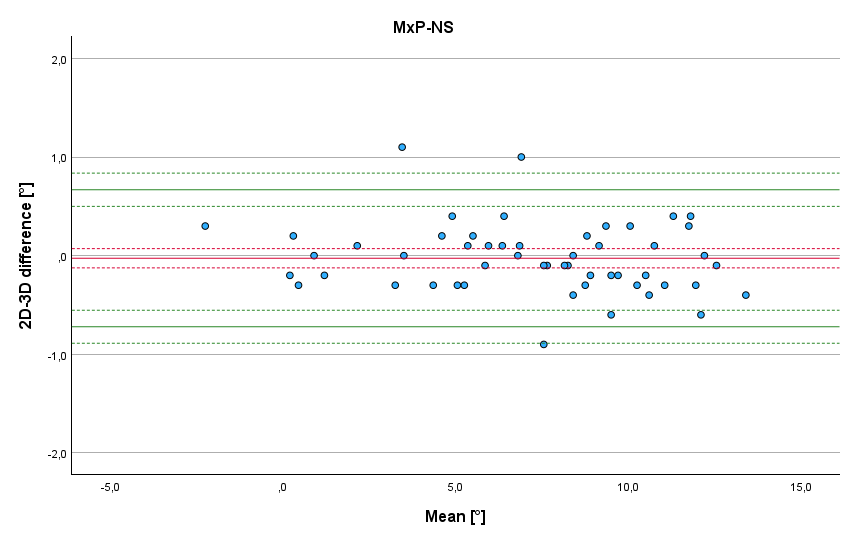


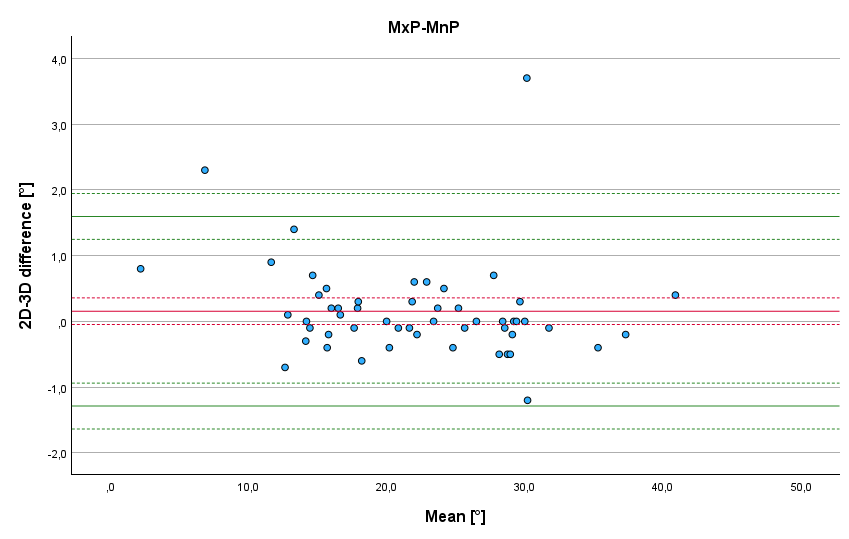


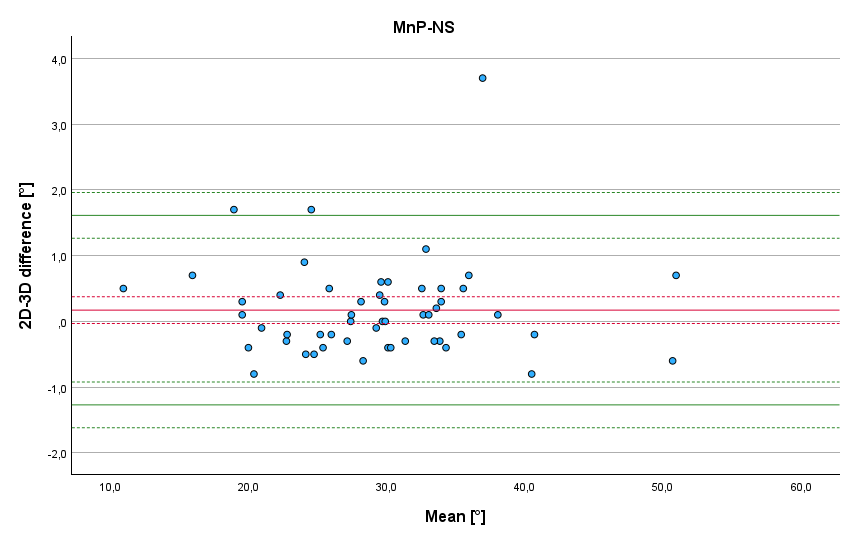

Supplement: Supplementary file 1 [file 1609798a8e3c42cbdf8b7cd6.docx]
